# Supplementary material
Source: HighWire-hosted journal article supplement (https://www.jrheum.org/highwire/filestream/39656/field_highwire_adjunct_files/0/191365DataSuppl.pdf)
Supplement: 191365DataSuppl.pdf [file 191365DataSuppl.pdf]

**ONLINE SUPPLEMENTARY MATERIAL**

**Supplementary Table 1. STRATUS study: ethics committee approval**

| <b>Country</b> | <b>Study site and Principle investigator</b>                                             | <b>EC approval number</b>                    |
|----------------|------------------------------------------------------------------------------------------|----------------------------------------------|
| Argentina      | Centro de Investigaciones Reumatológicas<br>Eleonora del Valle Lucero                    | 1323/26/2016                                 |
|                | APRILLUS<br>Pablo Alejandro Mannucci                                                     |                                              |
| Israel         | Tel Aviv Sourasky Medical Center<br>Irena Litinsky                                       | TLV-0197-16 / 20161883                       |
|                | Chaim Sheba Medical Center<br>Michael Segel                                              |                                              |
|                | Rabin Medical Center-Beilinson Campus<br>Mordechai Kramer                                |                                              |
| Italy          | Arcispedale S. Maria Nuova Azienda<br>Ospedaliera di Reggio Emilia<br>Gianluigi Bajocchi | OF 03/08/2016                                |
| Poland         | SPZOZ Uniwersytecki Szpital Kliniczny nr 1<br>im.N.Barlickiego UM<br>Wojciech Piotrowski | RNN/205/16 KE                                |
| United Kingdom | Royal Free Hospital<br>Christopher Denton                                                | 16/LO/1138                                   |
|                | Addenbrooke's Hospital<br>Frances Hall                                                   |                                              |
| United States  | University of Michigan<br>Dinesh Khanna                                                  | QUI1-16-026 Copernicus IRB<br>/NEIRB# 16-181 |
|                | Rutgers - Robert Wood Johnson Medical<br>School<br>Vivien Hsu                            |                                              |
|                | University of California at Los Angeles<br>Elizabeth Volkmann                            |                                              |
|                | Central Florida Pulmonary Group<br>Daniel Layish                                         |                                              |
|                | Boston University School of Medicine<br>Robert Simms                                     |                                              |
|                | Northwestern Medical Faculty Foundation<br>Jane Dematte-D'Amico                          |                                              |
